# Supplementary material for: Fabrication of lightweight and flexible silicon rubber foams with ultra-efficient electromagnetic interference shielding and adjustable low reflectivity
Source: Royal Society of Chemistry journal article supplement (doi:10.1039/c9tc05152j), 2019-11-19
Supplement: c9tc05152j1.pdf [file c9tc05152j1.pdf]

## Supporting Information

### **Fabrication of a lightweight and flexible silicon rubber foams with ultra-efficient electromagnetic interference shielding and adjustable low reflectivity**

Jianming Yang, Xia Liao\*, Gui Wang, Jia Chen, Wanyu Tang, Tengfei Wang and Guangxian Li

*College of Polymer Science and Engineering, State Key Laboratory of Polymer Materials Engineering, Sichuan University, Chengdu 610065, People's Republic of China.*

**\*Corresponding Author**

E-mail address: [xliao@scu.edu.cn](mailto:xliao@scu.edu.cn) (X. Liao)

**1. The calculation of the power coefficients of absorption (A), reflection (R) and transmission (T) as well as the absorbed SE ( $SE_A$ ), reflected SE ( $SE_R$ ) and total SE ( $SE_T$ )**

The S-parameters ( $S_{11}$  and  $S_{21}$ ) were recorded from the Agilent N5230 vector network analyzer to calculate the power coefficients and EMI SE through the following equations:

$$R = |S_{11}|^2 \quad (1)$$

$$T = |S_{21}|^2 \quad (2)$$

$$A = 1 - R - T \quad (3)$$

$$SE_R = -10 \lg(1 - R) \quad (4)$$

$$SE_A = -10 \lg[T / (1 - R)] \quad (5)$$

$$SE_T = SE_R + SE_A + SE_M \quad (6)$$

In the above equation, the  $SE_T$  is the sum of  $SE_A$ ,  $SE_R$  and multiple reflections ( $SE_M$ ).

Moreover,  $SE_M$  can be ignored when  $SE_T$  is greater than 15 dB.<sup>1-3</sup>

**2. XPS spectra of  $Fe_3O_4@MWCNT$ s nanoparticles**

The surface chemical compositions of  $Fe_3O_4@MWCNT$ -1,  $Fe_3O_4@MWCNT$ -2 and MWCNT were characterized by XPS. The corresponding survey of XPS spectra are exhibited in Fig. S1. Obviously, strong  $Fe_{2p3/2}$  and  $Fe_{2p1/2}$  signals can be observed from the XPS spectra of  $Fe_3O_4@MWCNT$ , which indicates the existence of  $Fe_3O_4$  nanoparticles (as shown in Fig. S1a, b). The peaks located at 530.5 eV and 530.4 eV correlate to the binding energies of Fe-O in the spectrum of  $Fe_3O_4@MWCNT$ -1 and

$\text{Fe}_3\text{O}_4@\text{MWCNT}$ -2, respectively.<sup>4-5</sup> The appearance of Fe-O peak illustrates that  $\text{Fe}_3\text{O}_4$  particles are successfully decorated on MWCNT.

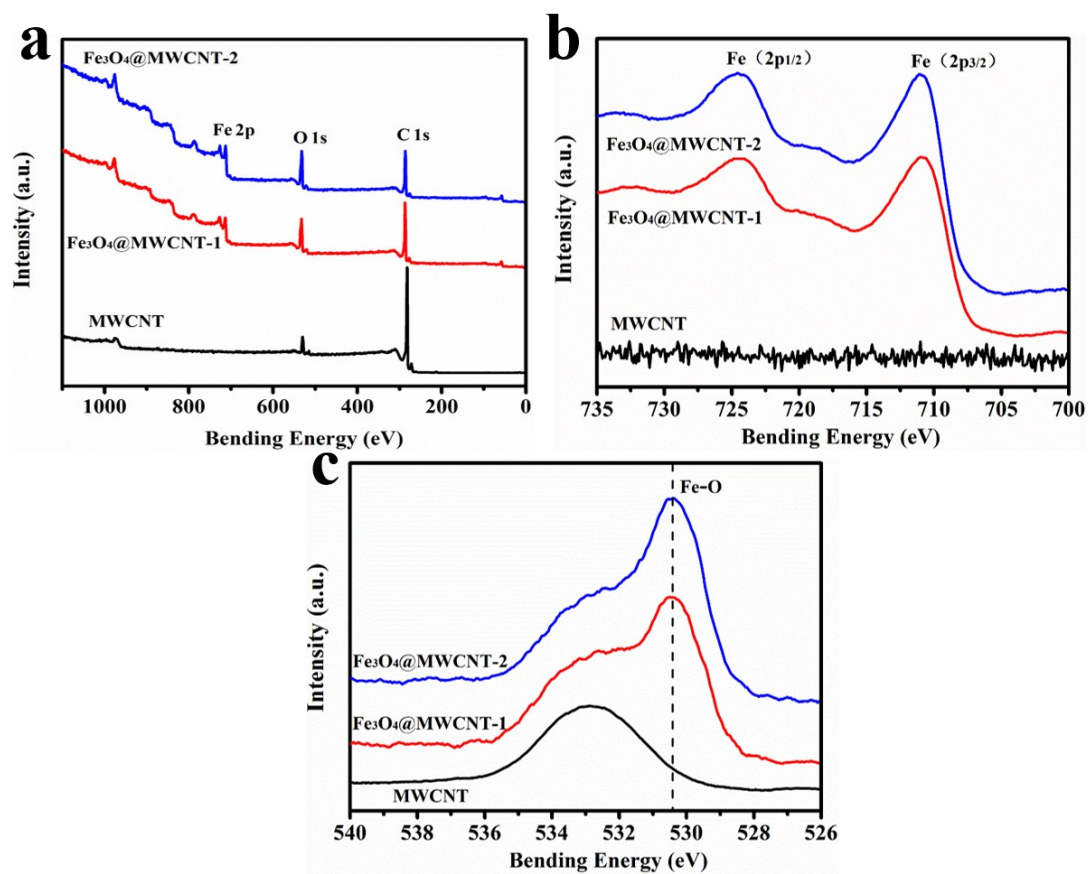

**Fig. S1** (a) XPS spectra, (b)  $\text{Fe}_{2p}$  spectra and (c)  $\text{O}_{1s}$  spectra of  $\text{Fe}_3\text{O}_4@\text{MWCNT}$ -1,  $\text{Fe}_3\text{O}_4@\text{MWCNT}$ -2 and MWCNT.

**3. Photographs showing the electrical properties, magnetic and flexibility properties of the VMQ/Fe<sub>3</sub>O<sub>4</sub>@MWCNT/Ag@NWF composite foams**

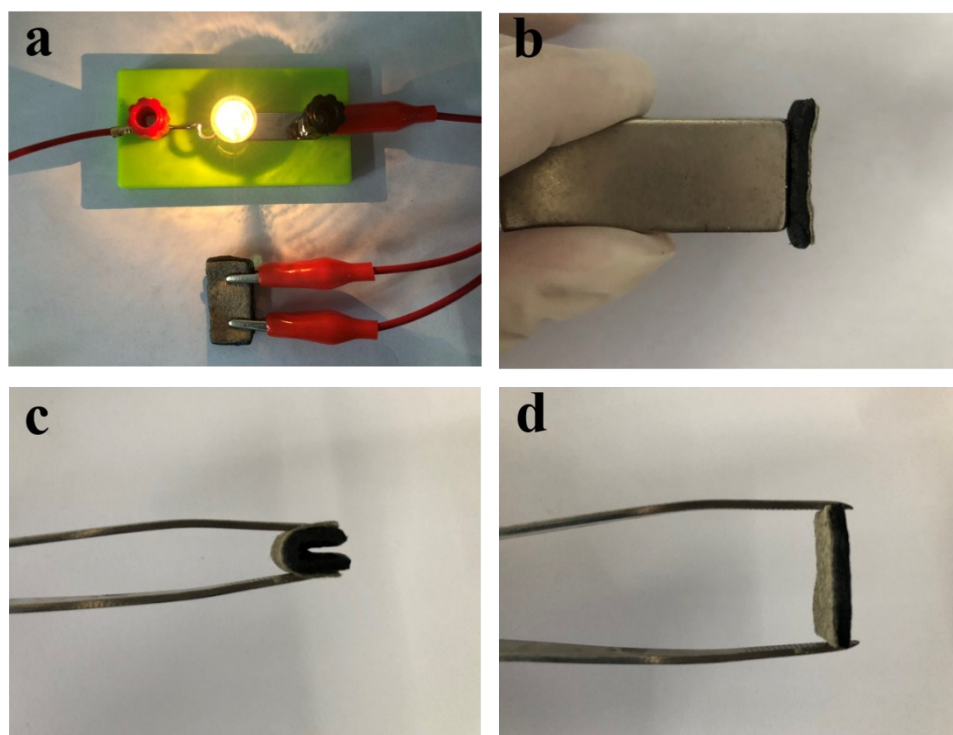

**Fig. S2** Digital photograph showing a favorable (a) conductivity, (b) magnetic response of the VMQ/Fe<sub>3</sub>O<sub>4</sub>@MWCNT/Ag@NWF foams. The photographs of the composite foams (c) after bending and (d) recovery.

**References**

- 1 D. X. Yan, H. Pang, B. Li, R. Vajtai, L. Xu, P. G. Ren, J. H. Wang and Z. M. Li, *Adv. Funct. Mater.*, 2015, **25**, 559–566.
- 2 T. K. Gupta, B. P. Singh, S. R. Dhakate, V. N. Singh and R. B. Mathur, *J. Mater. Chem. A*, 2013, **1**, 9138–9149.
- 3 H. H. Chen, Z. Y. Huang, Y. Huang, Y. Zhang, Z. Ge, B. Qin, Z. F. Liu and Y. S. Chen, *Carbon*, 2017, **124**, 506–514.
- 4 Y. H. Zhan, J. Wang, K. Y. Zhang, Y. C. Li, Y. Y. Meng, N. Yan and H. S. Xia, *Chem. Eng. J.*, 2018, **344**, 184–193.
- 5 A. Lopez-Santiago, H. R. Grant, P. Gangopadhyay, R. Voorakaranam, R. A. Norwood and N. Peyghambarian, *Optical Materials Express*, 2012, **2**, 978–986.
